S2. General practitioner individual score

| GP | Q1 | Q2 | Q3 | Q4 | Q5 | Q6 | Q7 | Q8 | Q9 | Q10 | Q11 | Q12 | Q13 | Q14 | Q15 | Q16 | Q17 | Q18 | Q19 | Q20 | Q21 | Q22 | Q23 | Q24 | Q25 |   |
|----|----|----|----|----|----|----|----|----|----|-----|-----|-----|-----|-----|-----|-----|-----|-----|-----|-----|-----|-----|-----|-----|-----|---|
| 1  | 1  | 4  | 3  | 4  | 4  | 3  | 4  | 3  | 5  | 1   | 5   | 4   | 4   | 5   | 5   | 5   | 5   | 5   | 4   | 4   | 5   | 5   | 5   | 5   | 5   |   |
| 2  | 2  | 4  | 4  | 3  | 4  | 4  | 4  | 2  | 5  | 1   | 4   | 5   | 4   | 4   | 5   | 5   | 5   | 5   | 4   | 4   | 4   | 5   | 3   | 4   | 5   |   |
| 3  | 2  | 1  | 5  | 4  | 4  | 4  | 4  | 3  | 5  | 2   | 5   | 5   | 4   | 4   | 4   | 5   | 5   | 4   | 4   | 4   | 4   | 3   | 5   | 5   | 4   | 4 |
| 4  | 2  | 4  | 4  | 5  | 4  | 5  | 4  | 5  | 5  | 1   | 5   | 4   | 5   | 5   | 5   | 5   | 5   | 5   | 5   | 5   | 4   | 5   | 5   | 5   | 5   | 5 |
| 5  | 2  | 5  | 3  | 4  | 4  | 3  | 2  | 5  | 5  | 1   | 4   | 3   | 4   | 4   | 5   | 4   | 4   | 4   | 4   | 3   | 4   | 5   | 5   | 5   | 4   | 4 |
| 6  | 3  | 5  | 4  | 5  | 5  | 4  | 5  | 3  | 5  | 1   | 5   | 4   | 4   | 5   | 4   | 5   | 5   | 4   | 5   | 4   | 5   | 5   | 5   | 5   | 5   | 5 |
| 7  | 3  | 4  | 2  | 4  | 5  | 3  | 4  | 4  | 4  | 2   | 3   | 3   | 3   | 4   | 5   | 4   | 3   | 3   | 4   | 3   | 2   | 2   | 4   | 4   | 2   |   |
| 8  | 3  | 5  | 4  | 5  | 5  | 5  | 4  | 4  | 5  | 1   | 4   | 4   | 5   | 4   | 5   | 4   | 5   | 5   | 5   | 5   | 5   | 5   | 5   | 5   | 5   | 4 |
| 9  | 3  | 1  | 3  | 4  | 4  | 4  | 3  | 5  | 5  | 2   | 5   | 3   | 5   | 5   | 3   | 4   | 4   | 5   | 5   | 5   | 5   | 5   | 5   | 5   | 5   | 4 |
| 10 | 3  | 1  | 5  | 5  | 5  | 5  | 4  | 4  | 5  | 4   | 5   | 5   | 4   | 5   | 4   | 5   | 5   | 5   | 5   | 5   | 5   | 4   | 4   | 3   | 5   | 4 |
| 11 | 3  | 1  | 3  | 4  | 4  | 4  | 3  | 4  | 5  | 2   | 4   | 3   | 4   | 5   | 4   | 4   | 5   | 4   | 4   | 4   | 4   | 5   | 4   | 4   | 4   | 5 |
| 12 | 4  | 5  | 4  | 4  | 5  | 4  | 4  | -  | 3  | 5   | 4   | 5   | 5   | 4   | 4   | 4   | 4   | 5   | 4   | 5   | 5   | 5   | 5   | 5   | 5   | 5 |
| 13 | 4  | 5  | 1  | 4  | 4  | 4  | 3  | 4  | 5  | 1   | 5   | 4   | 4   | 4   | 5   | 5   | 5   | 4   | 5   | 5   | 5   | 4   | 5   | 4   | 4   | 4 |
| 14 | 4  | 4  | 3  | 4  | 4  | 4  | 3  | 3  | 4  | 2   | 5   | 4   | 4   | 4   | 4   | 4   | 3   | 3   | 3   | 3   | 5   | 4   | 5   | 4   | 4   | 4 |
| 15 | 5  | 5  | 5  | 5  | 5  | 4  | 4  | 5  | 4  | 5   | 1   | 5   | 5   | 4   | 5   | 5   | 4   | 5   | 5   | 5   | 4   | 4   | 5   | 3   | 4   | 4 |
| 16 | 5  | 5  | 4  | 5  | 5  | 4  | 4  | 5  | 5  | 1   | 5   | 4   | 5   | 4   | 4   | 5   | 5   | 5   | 4   | 5   | 5   | 5   | 5   | 5   | 5   | 5 |
| 17 | 5  | 5  | 5  | 4  | 4  | 4  | 3  | 5  | 5  | 2   | 5   | 4   | 4   | 4   | 5   | 5   | 5   | 4   | 3   | 4   | 5   | 2   | 5   | 5   | 5   | 4 |
| 18 | 5  | 4  | 4  | 4  | 4  | 4  | 4  | 4  | 4  | 4   | 4   | 4   | 4   | 4   | 5   | 4   | 4   | 4   | 4   | 4   | 4   | 4   | 4   | 4   | 4   | 4 |
| 19 | 5  | 5  | 4  | 4  | 4  | 5  | 4  | 5  | 5  | 1   | 5   | 5   | 4   | 4   | 5   | 5   | 5   | 4   | 4   | 4   | 4   | 5   | 5   | 5   | 5   | 5 |
| 20 | 5  | 5  | 4  | 5  | 5  | 5  | 4  | 5  | 5  | 2   | 4   | 4   | 4   | 5   | 5   | 5   | 5   | 5   | 5   | 4   | 5   | 3   | 4   | 5   | 5   | 3 |

GP: General Practitioner
